# Supplementary material for: Importin subunit beta‐1 mediates ERK5 nuclear translocation, and its inhibition synergizes with ERK5 kinase inhibitors in reducing cancer cell proliferation
Source: PubMed Central journal article supplement (PMC11705758; doi:10.1002/1878-0261.13674), 2024-07-04
Supplement: MOL2-19-99-s001.pdf [file MOL2-19-99-s001.pdf]

**Supplementary Table S1.** *List of the antibodies used and their application.*

|                    |    |                   |           |                                               |
|--------------------|----|-------------------|-----------|-----------------------------------------------|
| Importin $\beta$ 1 | WB | Rabbit monoclonal | #8673     | Cell Signaling Technology, Danvers, MA, USA   |
| Fibrillarin        | WB | Mouse monoclonal  | sc-374022 | Santa Cruz Biotechnology, Santa Cruz, CA, USA |
| ERK5               | WB | Rabbit polyclonal | #3372     | Cell Signaling Technology, Danvers, MA, USA   |
| ERK5               | IF | Mouse monoclonal  | sc-398015 | Santa Cruz Biotechnology, Santa Cruz, CA, USA |
| pERK5-T218/Y220    | WB | Rabbit polyclonal | #3371     | Cell Signaling Technology, Danvers, MA, USA   |
| KLF-2              | WB | Rabbit monoclonal | #15306    | Cell Signaling Technology, Danvers, MA, USA   |
| MEK5               | WB | Mouse monoclonal  | sc-365198 | Santa Cruz Biotechnology, Santa Cruz, CA, USA |
| Importin $\beta$ 1 | IF | Rabbit polyclonal | PA5-83110 | ThermoFisher Scientific, Waltham, MA, USA     |
| Cyclin B1          | WB | Rabbit monoclonal | sc-245    | Santa Cruz Biotechnology, Santa Cruz, CA, USA |
| H4                 | WB | Rabbit monoclonal | #13919    | Cell Signaling Technology, Danvers, MA, USA   |
| $\alpha$ Tubulin   | WB | Mouse monoclonal  | sc-32293  | Santa Cruz Biotechnology, Santa Cruz, CA, USA |
| GAPDH              | WB | Mouse monoclonal  | sc-47724  | Santa Cruz Biotechnology, Santa Cruz, CA, USA |
| IRDye 800CW        | WB | Goat anti-rabbit  | 926-32211 | LI-COR Biosciences, Lincoln, NE, USA          |
| IRDye 800CW        | WB | Goat anti-mouse   | 926-32210 | LI-COR Biosciences, Lincoln, NE, USA          |
| IRDye 680RD        | WB | Goat anti-rabbit  | 926-68071 | LI-COR Biosciences, Lincoln, NE, USA          |
| IRDye 680RD        | WB | Goat anti-mouse   | 926-68070 | LI-COR Biosciences, Lincoln, NE, USA          |
